# Supplementary material
Source: publisher site journal article supplement (https://www.dovepress.com/article/339029)
Supplement: Supplementary file 1 [file get_supplementary_file.php]

**Table E1.** Multivariable Linear Regression Models for Pulmonary Function Measurements with Imaging Measurements Included in the Same Model in All Participants.

| **Parameter** | **Unstandardized Coefficients** | **SE** | **Standardized Coefficients** | **VIF** | ***P* values** |
| --- | --- | --- | --- | --- | --- |
| **Pre-bronchodilator FEV1 %pred*, %**  (R2=0.423; *p*<0.001) |  |  |  |  |  |
| TAC | 0.063 | 0.014 | 0.401 |  | <0.001 |
| LAA-950 | 0.024 | 0.303 | 0.010 |  | 0.937 |
| LAA-856 | -0.185 | 0.069 | -0.212 |  | 0.008 |
| Inspiratory Pi10 | -11.932 | 7.304 | -0.145 |  | 0.104 |
| Perc 15 | 0.183 | 0.093 | 0.239 |  | 0.049 |
| **Pre-bronchodilator FEV1/FVC*, %**  (R2=0.477; *p*<0.001) |  |  |  |  |  |
| TAC | 0.033 | 0.007 | 0.404 | 2.245 | <0.001 |
| LAA-950 | -0.190 | 0.151 | -0.144 | 3.954 | 0.210 |
| LAA-856 | -0.046 | 0.034 | -0.100 | 1.703 | 0.186 |
| Inspiratory Pi10 | -6.327 | 3.650 | -0.147 | 2.160 | 0.085 |
| Perc 15 | 0.104 | 0.046 | 0.259 | 3.988 | 0.026 |
| **Post-bronchodilator FEV1 %pred*, %**  (R2=0.355; *p*<0.001) |  |  |  |  |  |
| TAC | 0.063 | 0.014 | 0.401 | 2.226 | <0.001 |
| LAA-950 | 0.024 | 0.303 | 0.010 | 3.932 | 0.937 |
| LAA-856 | -0.185 | 0.069 | -0.212 | 1.693 | 0.008 |
| Inspiratory Pi10 | -11.932 | 7.304 | -0.145 | 2.174 | 0.104 |
| Perc 15 | 0.183 | 0.093 | 0.239 | 3.964 | 0.049 |

Abbreviations: SE=standard error; VIF=variance inflation factor; FEV1=forced expiratory volume in 1 second; TAC=total airway count; LAA-950=the percentage of low-attenuation area below -950 Hounsfield units on full-inspiration computed tomography; LAA-856=the percentage of low-attenuation area below -856 Hounsfield units on full-expiration computed tomography; Pi10=the square root of the airway wall area for a theoretical airway with 10-mm internal perimeter; Perc 15=the HU at which 15% of the voxels fall below at full inspiration; FVC=forced vital capacity.

*Adjusted by age, sex, body mass index, smoking status, and pack-years
